# Supplementary material for: Non-anaesthetist-administered ketamine for emergency caesarean section in Kenya: cost-effectiveness analysis
Source: HighWire-hosted journal article supplement (doi:10.1136/bmjopen-2021-051055), 2022-10-01
Supplement: bmjopen-2021-051055supp001_data_supplement.pdf [file bmjopen-2021-051055supp001_data_supplement.pdf]

## Supplementary Material

Table S1. MANDATE Input Parameters and Resulting Caesarean Procedures

| <b>OBSTRUCTED LABOR</b>                                             |          |          |            |
|---------------------------------------------------------------------|----------|----------|------------|
| FIRST Stage OL Treatment                                            | Baseline | Improved | Difference |
| Penetration rate in the Hospital                                    | 0.75     | 0.99     |            |
| Utilization rate in the Hospital                                    | 0.6      | 0.99     |            |
| Efficacy (% reduction in condition) in the Hospital                 | 1        |          |            |
| Efficacy (% reduction in Other Fetal Death from OL) in the Hospital | 0.95     |          |            |
| Efficacy (% reduction in Ruptured Uterus) in the Hospital           | 0.95     |          |            |
| Efficacy (% reduction in Birth Asphyxia) in the Hospital            | 0.85     |          |            |
| Efficacy (% reduction in Maternal Sepsis) in the Hospital           | 0.85     |          |            |
| Efficacy (% reduction in Neonatal SBI ) in the Hospital             | 0.85     |          |            |
| Efficacy (% reduction in PPH Atonic Uterus) in the Hospital         | 0.85     |          |            |
| Number CS received                                                  | 3046     | 6768     | 3722       |
| SECOND Stage OL Treatment                                           | Baseline | Improved | Difference |
| Penetration rate in the Hospital                                    | 0.75     | 0.99     |            |
| Utilization rate in the Hospital                                    | 0.6      | 0.99     |            |
| Efficacy (% reduction in condition) in the Hospital                 | 1        |          |            |
| Efficacy (% reduction in Other Fetal Death from OL) in the Hospital | 0.95     |          |            |
| Efficacy (% reduction in Ruptured Uterus) in the Hospital           | 0.95     |          |            |
| Efficacy (% reduction in Birth Asphyxia) in the Hospital            | 0.85     |          |            |
| Efficacy (% reduction in Maternal Sepsis) in the Hospital           | 0.85     |          |            |
| Efficacy (% reduction in Neonatal SBI ) in the Hospital             | 0.85     |          |            |

|                                                                     |              |              |             |
|---------------------------------------------------------------------|--------------|--------------|-------------|
| Efficacy (% reduction in PPH Atonic Uterus) in the Hospital         | 0.85         |              |             |
| Number CS                                                           | 2543         | 5652         | 3109        |
| <hr/>                                                               |              |              |             |
| FIRST Stage Protracted OL Treatment (Late CS - efficacy lower)      | Baseline     | Improved     | Difference  |
| Penetration rate in the Hospital                                    | 0.75         | 0.99         |             |
| Utilization rate in the Hospital                                    | 0.95         | 0.99         |             |
| Efficacy (% reduction in condition) in the Hospital                 | 1            |              |             |
| Efficacy (% reduction in Other Fetal Death from OL) in the Hospital | 0.1          |              |             |
| Efficacy (% reduction in Ruptured Uterus) in the Hospital           | 0.7          |              |             |
| Efficacy (% reduction in Birth Asphyxia) in the Hospital            | 0.2          |              |             |
| Efficacy (% reduction in Maternal Sepsis) in the Hospital           | 0.4          |              |             |
| Efficacy (% reduction in Neonatal SBI ) in the Hospital             | 0.2          |              |             |
| Efficacy (% reduction in PPH Atonic Uterus) in the Hospital         | 0.65         |              |             |
| Number CS                                                           | 4491         | 3164         | -1327       |
| <hr/>                                                               |              |              |             |
| SECOND Stage Protracted OL Treatment                                | Baseline     | Improved     | Difference  |
| Penetration rate in the Hospital                                    | 0.75         | 0.99         |             |
| Utilization rate in the Hospital                                    | 0.95         | 0.99         |             |
| Efficacy (% reduction in condition) in the Hospital                 | 1            |              |             |
| Efficacy (% reduction in Other Fetal Death from OL) in the Hospital | 0.1          |              |             |
| Efficacy (% reduction in Ruptured Uterus) in the Hospital           | 0.7          |              |             |
| Efficacy (% reduction in Birth Asphyxia) in the Hospital            | 0.2          |              |             |
| Efficacy (% reduction in Maternal Sepsis) in the Hospital           | 0.4          |              |             |
| Efficacy (% reduction in Neonatal SBI ) in the Hospital             | 0.2          |              |             |
| Efficacy (% reduction in Atonic Uterus) in the Hospital             | 0.65         |              |             |
| Number CS                                                           | 3134         | 2746         | -388        |
|                                                                     | Baseline     | Improved     | Difference  |
| <b>TOTAL CS FOR OBSTRUCTED LABOR</b>                                | <b>13214</b> | <b>18330</b> | <b>5116</b> |

**PRE-ECLAMPSIA AND ECLAMPSIA**

| Early Low Rate C-section Technology Interventions | Baseline | Improved | Difference |
|---------------------------------------------------|----------|----------|------------|
| Penetration                                       | 0.75     | 0.99     | 0.24       |
| Utilization                                       | 0.4      | 0.99     | 0.59       |
| Mild PE Maternal Efficacy                         | 0.95     |          |            |
| Mild PE Fetal Efficacy                            | 0.5      |          |            |
| Severe PE Maternal Efficacy                       | 0.8      |          |            |
| Severe PE Fetal Efficacy                          | 0.3      |          |            |
| Mild PE Maternal 1st Seizure Efficacy             | 0.95     |          |            |
| Severe PE Maternal 1st Seizure Efficacy           | 0.8      |          |            |
| CS Numbers                                        | 1047     | 3489     | 2442       |

Early High Rate C-section Technology Interventions (i.e. C-section or induction (to prevent eclampsia if mother is diagnosed with severe preeclampsia))

| Early High Rate C-section Technology Interventions (i.e. C-section or induction (to prevent eclampsia if mother is diagnosed with severe preeclampsia)) | Baseline | Improved | Difference |
|---------------------------------------------------------------------------------------------------------------------------------------------------------|----------|----------|------------|
| Penetration                                                                                                                                             | 0.75     | 0.99     | 0.24       |
| Utilization                                                                                                                                             | 0.8      | 0.99     | 0.19       |
| Mild PE Maternal Efficacy                                                                                                                               | 0.6      |          |            |
| Mild PE Fetal Efficacy                                                                                                                                  | 0.6      |          |            |
| Severe PE Maternal Efficacy                                                                                                                             | 0.8      |          | -0.8       |
| Severe PE Fetal Efficacy                                                                                                                                | 0.3      |          |            |
| Mild PE Maternal 1st Seizure Efficacy                                                                                                                   | 0.6      |          |            |
| Severe PE Maternal 1st Seizure Efficacy                                                                                                                 | 0.8      |          |            |
| CS Numbers                                                                                                                                              | 982      | 1636     | 654        |

Standard C-section Technology Interventions (for those DIAGNOSED WITH ECLAMPSIA that did not have early CS and that have intra and ante seizure)

| Standard C-section Technology Interventions (for those DIAGNOSED WITH ECLAMPSIA that did not have early CS and that have intra and ante seizure) | Baseline | Improved | Difference |
|--------------------------------------------------------------------------------------------------------------------------------------------------|----------|----------|------------|
| Penetration                                                                                                                                      | 0.75     | 0.99     | 0.24       |
| Utilization                                                                                                                                      | 0.8      | 0.99     | 0.19       |
| Maternal 1st&Multiple Seizure Efficacy                                                                                                           | 0.75     |          |            |
| Mild PE Fetal Efficacy                                                                                                                           | 0.4      |          |            |
| Severe PE Maternal 1st&Multiple Seizure Efficacy                                                                                                 | 0.75     |          |            |
| Severe PE Fetal Efficacy                                                                                                                         | 0.4      |          |            |
| CS Numbers                                                                                                                                       | 189      | 306      | 117        |

Standard C-section Technology Interventions (for those DIAGNOSED WITH ECLAMPSIA that did not have early CS and that have intra and ante seizure)

| Standard C-section Technology Interventions (for those DIAGNOSED WITH ECLAMPSIA that did not have early CS and that have intra and ante seizure) | Baseline | Improved | Difference |
|--------------------------------------------------------------------------------------------------------------------------------------------------|----------|----------|------------|
|--------------------------------------------------------------------------------------------------------------------------------------------------|----------|----------|------------|

|                                                  |             |             |             |
|--------------------------------------------------|-------------|-------------|-------------|
| Penetration                                      | 0.75        | 0.99        | 0.24        |
| Utilization                                      | 0.8         | 0.99        | 0.19        |
| Maternal 1st&Multiple Seizure Efficacy           | 0.75        |             |             |
| Mild PE Fetal Efficacy                           | 0.4         |             |             |
| Severe PE Maternal 1st&Multiple Seizure Efficacy | 0.75        |             |             |
| Severe PE Fetal Efficacy                         | 0.4         |             |             |
| CS Numbers                                       | 23          | 38          | 15          |
|                                                  | Baseline    | Improved    | Difference  |
| <b>TOTAL C/S FOR PRE-ECLAMPSIA AND ECLAMPSIA</b> | <b>2241</b> | <b>5469</b> | <b>3228</b> |

#### ABRUPTION, PREVIA, RUPTURED UTERUS

|                                                           |          |          |            |
|-----------------------------------------------------------|----------|----------|------------|
| AIPH due to Significant Abruption Treatment (Early Stage) | Baseline | Improved | Difference |
| Penetration rate in the Hospital                          | 0.75     | 0.99     | 0.24       |
| Utilization rate in the Hospital                          | 0.2      | 0.99     | 0.79       |
| Efficacy (% reduction in condition) in the Hospital       | 0.9      |          |            |
| Efficacy (% reduction in Birth Asphyxia)                  | 0.85     |          |            |
| Efficacy (% reduction in Fetal Deaths)                    | 0.85     |          |            |
| Number CS received                                        | 71       | 475      | 404        |
| AIPH due to Significant Abruption Treatment (Late Stage)  | Baseline | Improved | Difference |
| Penetration rate in the Hospital                          | 0.75     | 0.99     | 0.24       |
| Utilization rate in the Hospital                          | 0.6      | 0.99     | 0.39       |
| Efficacy (% reduction in condition) in the Hospital       | 0.7      |          |            |
| Efficacy (% reduction in Birth Asphyxia)                  | 0.2      |          |            |
| Efficacy (% reduction in Fetal Deaths)                    | 0.1      |          |            |
| Number CS received                                        | 424      | 805      | 381        |
| Placenta Previa Treatment (Early Stage)                   | Baseline | Improved | Difference |
| Penetration rate in the Hospital                          | 0.75     | 0.99     | 0.24       |
| Utilization rate in the Hospital                          | 0.2      | 0.99     | 0.79       |
| Efficacy (% reduction in condition) in the Hospital       | 0.9      |          |            |
| Efficacy (% reduction in Birth Asphyxia)                  | 0.85     |          |            |
| Efficacy (% reduction in Fetal Deaths)                    | 0.95     |          |            |
| Number CS received                                        | 24       | 159      | 135        |
| Placenta Previa Treatment (Late Stage)                    | Baseline | Improved | Difference |
| Penetration rate in the Hospital                          | 0.75     | 0.99     | 0.24       |
| Utilization rate in the Hospital                          | 0.6      | 0.99     | 0.39       |

|                                                         |            |             |             |
|---------------------------------------------------------|------------|-------------|-------------|
| Efficacy (% reduction in condition) in the Hospital     | 0.7        |             |             |
| Efficacy (% reduction in Birth Asphyxia)                | 0.2        |             |             |
| Efficacy (% reduction in Fetal Deaths)                  | 0.1        |             |             |
| Number CS received                                      | 142        | 263         | 121         |
| Ruptured Uterus Treatment (Early Stage)                 | Baseline   | Improved    | Difference  |
| Penetration rate in the Hospital                        | 0.75       | 0.99        | 0.24        |
| Utilization rate in the Hospital                        | 0.25       | 0.99        | 0.74        |
| Efficacy (% reduction in condition) in the Hospital     | 0.75       |             |             |
| Efficacy (% reduction in Birth Asphyxia)                | 0.85       |             |             |
| Efficacy (% reduction in Fetal Deaths)                  | 0.85       |             |             |
| Number CS received                                      | 28         | 148         | 120         |
| Ruptured Uterus Treatment (Late Stage)                  | Baseline   | Improved    | Difference  |
| Penetration rate in the Hospital                        | 0.75       | 0.99        | 0.24        |
| Utilization rate in the Hospital                        | 0.75       | 0.99        | 0.24        |
| Efficacy (% reduction in condition) in the Hospital     | 0.55       |             |             |
| Efficacy (% reduction in Birth Asphyxia)                | 0.1        |             |             |
| Efficacy (% reduction in Fetal Deaths)                  | 0.1        |             |             |
| Number CS received                                      | 203        | 284         | 81          |
|                                                         | Baseline   | Improved    | Difference  |
| <b>TOTAL C/S FOR ABRUPTION, PREVIA, RUPTURED UTERUS</b> | <b>892</b> | <b>2134</b> | <b>1242</b> |

#### FETAL DISTRESS

|                                                                |          |          |            |
|----------------------------------------------------------------|----------|----------|------------|
| SFD- Multiple births during First Stage Labor Treatment        | Baseline | Improved | Difference |
| Penetration rate in the Hospital                               | 0.75     | 0.99     | 0.24       |
| Utilization rate in the Hospital                               | 0.4      | 0.99     | 0.59       |
| Efficacy (% reduction in condition) in the Hospital            | 0.9      |          |            |
| Efficacy (% reduction in Birth Asphyxia)                       | 0.5      |          |            |
| Number CS received                                             | 52       | 173      | 121        |
| SFD- Multiple births during Second Stage Labor Final Treatment | Baseline | Improved | Difference |
| Penetration rate in the Hospital                               | 0.75     | 0.99     | 0.24       |
| Utilization rate in the Hospital                               | 0.4      | 0.99     | 0.59       |
| Efficacy (% reduction in condition) in the Hospital            | 0.9      |          |            |
| Efficacy (% reduction in Birth Asphyxia)                       | 0.5      |          |            |
| Number CS received                                             | 21       | 69       | 48         |

| SFD- IUGR during First Stage Labor Treatment                 | Baseline | Improved | Difference |
|--------------------------------------------------------------|----------|----------|------------|
| Penetration rate in the Hospital                             | 0.75     | 0.99     | 0.24       |
| Utilization rate in the Hospital                             | 0.4      | 0.99     | 0.59       |
| Efficacy (% reduction in condition) in the Hospital          | 0.9      |          |            |
| Efficacy (% reduction in Birth Asphyxia)                     | 0.5      |          |            |
| Number CS received                                           | 499      | 1663     | 1164       |
| SFD- IUGR during Second Stage Labor Final Treatment          | Baseline | Improved | Difference |
| Penetration rate in the Hospital                             | 0.75     | 0.99     | 0.24       |
| Utilization rate in the Hospital                             | 0.4      | 0.99     | 0.59       |
| Efficacy (% reduction in condition) in the Hospital          | 0.9      |          |            |
| Efficacy (% reduction in Birth Asphyxia)                     | 0.5      |          |            |
| Number CS received                                           | 199      | 664      | 465        |
| SFD- Breech during First Stage Labor Treatment               | Baseline | Improved | Difference |
| Penetration rate in the Hospital                             | 0.75     | 0.99     | 0.24       |
| Utilization rate in the Hospital                             | 0.4      | 0.99     | 0.59       |
| Efficacy (% reduction in condition) in the Hospital          | 0.9      |          |            |
| Efficacy (% reduction in Birth Asphyxia)                     | 0.5      |          |            |
| Number CS received                                           | 52       | 172      | 120        |
| SFD- Breech during Second Stage Labor Final Treatment        | Baseline | Improved | Difference |
| Penetration rate in the Hospital                             | 0.75     | 0.99     | 0.24       |
| Utilization rate in the Hospital                             | 0.4      | 0.99     | 0.59       |
| Efficacy (% reduction in condition) in the Hospital          | 0.9      |          |            |
| Efficacy (% reduction in Birth Asphyxia)                     | 0.5      |          |            |
| Number CS received                                           | 21       | 69       | 48         |
| SFD- Cord Accident during First Stage Labor Treatment        | Baseline | Improved | Difference |
| Penetration rate in the Hospital                             | 0.75     | 0.99     | 0.24       |
| Utilization rate in the Hospital                             | 0.4      | 0.99     | 0.59       |
| Efficacy (% reduction in condition) in the Hospital          | 0.9      |          |            |
| Efficacy (% reduction in Birth Asphyxia)                     | 0.5      |          |            |
| Number CS received                                           | 203      | 678      | 475        |
| SFD- Cord Accident during Second Stage Labor Final Treatment | Baseline | Improved | Difference |

|                                                             |                 |                 |                   |
|-------------------------------------------------------------|-----------------|-----------------|-------------------|
| Penetration rate in the Hospital                            | 0.75            | 0.99            | 0.24              |
| Utilization rate in the Hospital                            | 0.4             | 0.99            | 0.59              |
| Efficacy (% reduction in condition) in the Hospital         | 0.9             |                 |                   |
| Efficacy (% reduction in Birth Asphyxia)                    | 0.5             |                 |                   |
| Number CS received                                          | 81              | 271             | 190               |
| <b>SFD- Other during First Stage Labor Treatment</b>        | <b>Baseline</b> | <b>Improved</b> | <b>Difference</b> |
| Penetration rate in the Hospital                            | 0.75            | 0.99            | 0.24              |
| Utilization rate in the Hospital                            | 0.4             | 0.99            | 0.59              |
| Efficacy (% reduction in condition) in the Hospital         | 0.9             |                 |                   |
| Efficacy (% reduction in Birth Asphyxia)                    | 0.5             |                 |                   |
| Number CS received                                          | 598             | 1993            | 1395              |
| <b>SFD- Other during Second Stage Labor Final Treatment</b> | <b>Baseline</b> | <b>Improved</b> | <b>Difference</b> |
| Penetration rate in the Hospital                            | 0.75            | 0.99            | 0.24              |
| Utilization rate in the Hospital                            | 0.4             | 0.99            | 0.59              |
| Efficacy (% reduction in condition) in the Hospital         | 0.9             |                 |                   |
| Efficacy (% reduction in Birth Asphyxia)                    | 0.5             |                 |                   |
| Number CS received                                          | 239             | 796             | 557               |
|                                                             | <b>Baseline</b> | <b>Improved</b> | <b>Difference</b> |
| <b>TOTAL C/S FOR FETAL DISTRESS</b>                         | <b>1965</b>     | <b>6548</b>     | <b>4583</b>       |
| <b>Total Additional CS All Indications Combined</b>         | <b>18312</b>    | <b>32481</b>    | <b>14169</b>      |





**Table S2. CONSOLIDATED HEALTH ECONOMIC EVALUATION REPORTING STANDARDS (CHEERS) CHECKLIST****CHEERS checklist—Items to include when reporting economic evaluations of health interventions**

| Section/item                    | Item No | Recommendation                                                                                                                                                                          | Reported on Section / Paragraph                          |
|---------------------------------|---------|-----------------------------------------------------------------------------------------------------------------------------------------------------------------------------------------|----------------------------------------------------------|
| <b>Title and abstract</b>       |         |                                                                                                                                                                                         |                                                          |
| Title                           | 1       | Identify the study as an economic evaluation or use more specific terms such as “cost-effectiveness analysis”, and describe the interventions compared.                                 | Title Page                                               |
| Abstract                        | 2       | Provide a structured summary of objectives, perspective, setting, methods (including study design and inputs), results (including base case and uncertainty analyses), and conclusions. | Abstract                                                 |
| <b>Introduction</b>             |         |                                                                                                                                                                                         |                                                          |
| Background and objectives       | 3       | Provide an explicit statement of the broader context for the study.                                                                                                                     | Introduction, Paragraphs 1-3                             |
|                                 |         | Present the study question and its relevance for health policy or practice decisions.                                                                                                   | Introduction, Paragraph 4                                |
| <b>Methods</b>                  |         |                                                                                                                                                                                         |                                                          |
| Target population and subgroups | 4       | Describe characteristics of the base case population and subgroups analysed, including why they were chosen.                                                                            | Methods, Paragraphs 1,7                                  |
| Setting and location            | 5       | State relevant aspects of the system(s) in which the decision(s) need(s) to be made.                                                                                                    | Methods, Paragraphs 1                                    |
| Study perspective               | 6       | Describe the perspective of the study and relate this to the costs being evaluated.                                                                                                     | Methods, line 108                                        |
| Comparators                     | 7       | Describe the interventions or strategies being compared and state why they were chosen.                                                                                                 | Abstract, Introduction line 50, Methods line 78, line 85 |
| Time horizon                    | 8       | State the time horizon(s) over which costs and consequences are being evaluated and say why appropriate.                                                                                | Methods, line 129                                        |
| Discount rate                   | 9       | Report the choice of discount rate(s) used for costs and outcomes and say why appropriate.                                                                                              | Methods, line 131                                        |
| Choice of health outcomes       | 10      | Describe what outcomes were used as the measure(s) of benefit in the evaluation and their relevance for the type of analysis performed.                                                 | Methods, Paragraphs 33-35                                |
| Measurement of effectiveness    | 11a     | <i>Single study-based estimates:</i> Describe fully the design features of the single                                                                                                   | Not applicable                                           |

| Section/item                                           | Item No | Recommendation                                                                                                                                                                                                                                                                                                               | Reported on Section / Paragraph                          |
|--------------------------------------------------------|---------|------------------------------------------------------------------------------------------------------------------------------------------------------------------------------------------------------------------------------------------------------------------------------------------------------------------------------|----------------------------------------------------------|
|                                                        |         | effectiveness study and why the single study was a sufficient source of clinical effectiveness data.                                                                                                                                                                                                                         |                                                          |
|                                                        | 11b     | <i>Synthesis-based estimates</i> : Describe fully the methods used for identification of included studies and synthesis of clinical effectiveness data.                                                                                                                                                                      | Methods, lines 52-106                                    |
| Measurement and valuation of preference based outcomes | 12      | If applicable, describe the population and methods used to elicit preferences for outcomes.                                                                                                                                                                                                                                  | Not applicable                                           |
| Estimating resources and costs                         | 13a     | <i>Single study-based economic evaluation</i> : Describe approaches used to estimate resource use associated with the alternative interventions. Describe primary or secondary research methods for valuing each resource item in terms of its unit cost. Describe any adjustments made to approximate to opportunity costs. | Not applicable                                           |
|                                                        | 13b     | <i>Model-based economic evaluation</i> : Describe approaches and data sources used to estimate resource use associated with model health states. Describe primary or secondary research methods for valuing each resource item in terms of its unit cost. Describe any adjustments made to approximate to opportunity costs. | Methods, line 108-127                                    |
| Currency, price date, and conversion                   | 14      | Report the dates of the estimated resource quantities and unit costs. Describe methods for adjusting estimated unit costs to the year of reported costs if necessary. Describe methods for converting costs into a common currency base and the exchange rate.                                                               | Methods, line 123-125                                    |
| Choice of model                                        | 15      | Describe and give reasons for the specific type of decision-analytical model used. Providing a figure to show model structure is strongly recommended.                                                                                                                                                                       | Methods, line 52-54, 80-85; Figure 1                     |
| Assumptions                                            | 16      | Describe all structural or other assumptions underpinning the decision-analytical model.                                                                                                                                                                                                                                     | Methods, line 52-166; Figure 1; Tables 1; Suppl material |
| Analytical methods                                     | 17      | Describe all analytical methods supporting the evaluation. This could include methods for dealing with skewed, missing, or censored data; extrapolation methods; methods for pooling data; approaches to                                                                                                                     | Methods, line 52-166, Figure1;                           |

| Section/item                                                         | Item No | Recommendation                                                                                                                                                                                                                                                              | Reported on Section / Paragraph                                                          |
|----------------------------------------------------------------------|---------|-----------------------------------------------------------------------------------------------------------------------------------------------------------------------------------------------------------------------------------------------------------------------------|------------------------------------------------------------------------------------------|
|                                                                      |         | validate or make adjustments (such as half cycle corrections) to a model; and methods for handling population heterogeneity and uncertainty.                                                                                                                                |                                                                                          |
| <b>Results</b>                                                       |         |                                                                                                                                                                                                                                                                             |                                                                                          |
| Study parameters                                                     | 18      | Report the values, ranges, references, and, if used, probability distributions for all parameters. Report reasons or sources for distributions used to represent uncertainty where appropriate. Providing a table to show the input values is strongly recommended.         | Methods, line 52-166; Tables 1; Figure 1; Table S1, S2, S4, S6 in Supplementary Material |
| Incremental costs and outcomes                                       | 19      | For each intervention, report mean values for the main categories of estimated costs and outcomes of interest, as well as mean differences between the comparator groups. If applicable, report incremental cost-effectiveness ratios.                                      | Results, 168-222; Table 4, Table S5                                                      |
| Characterising uncertainty                                           | 20a     | <i>Single study-based economic evaluation:</i> Describe the effects of sampling uncertainty for the estimated incremental cost and incremental effectiveness parameters, together with the impact of methodological assumptions (such as discount rate, study perspective). | Not applicable                                                                           |
|                                                                      | 20b     | <i>Model-based economic evaluation:</i> Describe the effects on the results of uncertainty for all input parameters, and uncertainty related to the structure of the model and assumptions.                                                                                 | Results, line 215-222; Table 4                                                           |
| Characterising heterogeneity                                         | 21      | If applicable, report differences in costs, outcomes, or cost-effectiveness that can be explained by variations between subgroups of patients with different baseline characteristics or other observed variability in effects that are not reducible by more information.  | Not applicable                                                                           |
| <b>Discussion</b>                                                    |         |                                                                                                                                                                                                                                                                             |                                                                                          |
| Study findings, limitations, generalisability, and current knowledge | 22      | Summarise key study findings and describe how they support the conclusions reached. Discuss limitations and the generalisability of the findings and how the findings fit with current knowledge.                                                                           | Discussion                                                                               |
| <b>Other</b>                                                         |         |                                                                                                                                                                                                                                                                             |                                                                                          |
| Source of funding                                                    | 23      | Describe how the study was funded and the role of the funder in the identification, design, conduct, and reporting of the                                                                                                                                                   | Funding information page 17                                                              |

| Section/item          | Item No | Recommendation                                                                                                                                                                                                                                    | Reported on Section / Paragraph |
|-----------------------|---------|---------------------------------------------------------------------------------------------------------------------------------------------------------------------------------------------------------------------------------------------------|---------------------------------|
|                       |         | analysis. Describe other non-monetary sources of support.                                                                                                                                                                                         |                                 |
| Conflicts of interest | 24      | Describe any potential for conflict of interest of study contributors in accordance with journal policy. In the absence of a journal policy, we recommend authors comply with International Committee of Medical Journal Editors recommendations. | Competing interests page 18     |

Table adapted from the Consolidated Health Economic Evaluation Reporting Standards (CHEERS) Checklist of items to include when reporting economic evaluations of health interventions.[1]

#### REFERENCE:

1. Husereau D, Drummond M, Petrou S, Carswell C, Moher D, Greenberg D, et al. Consolidated Health Economic Evaluation Reporting Standards (CHEERS)—Explanation and Elaboration: A Report of the ISPOR Health Economic Evaluation Publication Guidelines Good Reporting Practices Task Force. *Value Health*. 2013;16: 231–250. doi:10.1016/j.jval.2013.02.002

TABLE S3: COUNTY INDICATORS, 2018

| Region    | County        | Target | Skilled birth attendant present (%) | Population CS rate (%) | Facility CS rate (%) | Operating Rooms | Expected Births | Expected Emergency Caesarean delivery | Current Caesarean delivery |
|-----------|---------------|--------|-------------------------------------|------------------------|----------------------|-----------------|-----------------|---------------------------------------|----------------------------|
| Central   | Nyandarua     | Yes    | 85.3                                | 9.0                    | 10.6                 | 8               | 23,830          | 3,575                                 | 2,145                      |
|           | Murang'a      | Yes    | 85.5                                | 11.7                   | 13.7                 | 7               | 29,596          | 4,439                                 | 3,463                      |
|           | Nyeri         |        | 88.1                                | 13.5                   | 15.3                 | 12              | 23,926          | 3,589                                 | 3,230                      |
|           | Kirinyaga     |        | 92.3                                | 15.3                   | 16.6                 | 2               | 18,930          | 2,839                                 | 2,896                      |
|           | Kiambu        |        | 92.6                                | 20.1                   | 21.7                 | 14              | 76,295          | 11,444                                | 15,335                     |
| Coast     | Tana River    | Yes    | 32.2                                | 2.4                    | 7.5                  | 2               | 16,816          | 2,522                                 | 404                        |
|           | Kilifi        | Yes    | 52.3                                | 4.4                    | 8.4                  | 6               | 71,010          | 10,652                                | 3,124                      |
|           | Kwale         | Yes    | 50.1                                | 5.3                    | 10.6                 | 3               | 41,030          | 6,155                                 | 2,175                      |
|           | Taita Taveta  | Yes    | 62.5                                | 8.7                    | 13.9                 | 1               | 10,858          | 1,629                                 | 945                        |
|           | Lamu          |        | 47.3                                | 7.3                    | 15.4                 | 3               | 5,381           | 807                                   | 393                        |
|           | Mombasa       |        | 82.8                                | 13.3                   | 16.1                 | 18              | 49,198          | 7,380                                 | 6,543                      |
| Eastern   | Marsabit      | Yes    | 25.8                                | 2.3                    | 8.9                  | 2               | 8,744           | 1,312                                 | 201                        |
|           | Kitui         | Yes    | 46.2                                | 5.4                    | 11.7                 | 5               | 42,087          | 6,313                                 | 2,273                      |
|           | Isiolo        |        | 43.8                                | 6.9                    | 15.8                 | 2               | 8,168           | 1,225                                 | 564                        |
|           | Machakos      |        | 63.4                                | 11.4                   | 18.0                 | 7               | 47,372          | 7,106                                 | 5,400                      |
|           | Makueni       |        | 54.6                                | 9.9                    | 18.1                 | 4               | 34,112          | 5,117                                 | 3,377                      |
|           | Tharaka-Nithi |        | 76.6                                | 14.5                   | 18.9                 | 4               | 13,549          | 2,032                                 | 1,965                      |
|           | Embu          |        | 81.5                                | 15.9                   | 19.5                 | 6               | 19,314          | 2,897                                 | 3,071                      |
|           | Meru          |        | 82.8                                | 18.5                   | 22.3                 | 9               | 49,678          | 7,452                                 | 9,190                      |
| N-Eastern | Mandera       | Yes    | 38.7                                | 1.8                    | 4.7                  | 3               | 14,894          | 2,234                                 | 268                        |
|           | Wajir         | Yes    | 21.7                                | 1.3                    | 6.0                  | 4               | 24,791          | 3,719                                 | 322                        |

|                        |             |           |             |            |             |            |                  |                |                |
|------------------------|-------------|-----------|-------------|------------|-------------|------------|------------------|----------------|----------------|
|                        | Garissa     | Yes       | 39·8        | 5·5        | 13·8        | 21         | 22,773           | 3,416          | 1,253          |
| Nyanza                 | Homa Bay    | Yes       | 60·4        | 3·1        | 5·1         | 5          | 63,227           | 9,484          | 1,960          |
|                        | Siaya       | Yes       | 70·4        | 4·3        | 6·1         | 4          | 37,571           | 5,636          | 1,616          |
|                        | Nyamira     | Yes       | 74·1        | 5·2        | 7·0         | 1          | 18,737           | 2,811          | 974            |
|                        | Kisii       | Yes       | 72·8        | 5·3        | 7·3         | 13         | 46,315           | 6,947          | 2,455          |
|                        | Kisumu      | Yes       | 69·2        | 6·8        | 9·8         | 14         | 48,045           | 7,207          | 3,267          |
|                        | Migori      | Yes       | 53·4        | 6·5        | 12·2        | 5          | 54,290           | 8,144          | 3,529          |
| Rift Valley            | Turkana     | Yes       | 22·8        | 0·5        | 2·2         | 4          | 33,343           | 5,001          | 167            |
|                        | Elgeyo      |           |             |            |             |            |                  |                |                |
|                        | Marakwet    | Yes       | 65·0        | 3·5        | 5·4         | 6          | 16,143           | 2,421          | 565            |
|                        | Nandi       | Yes       | 46·8        | 2·8        | 6·0         | 4          | 38,628           | 5,794          | 1,082          |
|                        | Uasin Gishu | Yes       | 59·0        | 4·8        | 8·1         | 10         | 46,411           | 6,962          | 2,228          |
|                        | West Pokot  | Yes       | 27·0        | 2·2        | 8·1         | 2          | 29,019           | 4,353          | 638            |
|                        | Bomet       | Yes       | 52·2        | 4·8        | 9·2         | 8          | 48,237           | 7,236          | 2,315          |
|                        | Baringo     | Yes       | 53·8        | 5·2        | 9·7         | 4          | 22,869           | 3,430          | 1,189          |
|                        | Nakuru      | Yes       | 69·5        | 6·9        | 9·9         | 11         | 87,345           | 13,102         | 6,027          |
|                        | Samburu     | Yes       | 29·0        | 2·9        | 10·0        | 3          | 11,242           | 1,686          | 326            |
|                        | Narok       | Yes       | 40·3        | 5·1        | 12·7        | 5          | 61,305           | 9,196          | 3,127          |
|                        | Trans-Nzoia | Yes       | 41·8        | 5·3        | 12·7        | 3          | 50,735           | 7,610          | 2,689          |
|                        | Laikipia    | Yes       | 49·5        | 6·5        | 13·1        | 3          | 20,083           | 3,012          | 1,305          |
|                        | Kericho     |           | 64·4        | 10·3       | 16·0        | 9          | 35,841           | 5,376          | 3,692          |
|                        | Kajiado     |           | 63·2        | 11·1       | 17·6        | 8          | 44,297           | 6,645          | 4,917          |
| Western                | Kakamega    | Yes       | 48·6        | 3·1        | 6·4         | 6          | 71,779           | 10,767         | 2,225          |
|                        | Busia       | Yes       | 58·5        | 4·0        | 6·8         | 7          | 39,301           | 5,895          | 1,572          |
|                        | Bungoma     | Yes       | 41·4        | 5·0        | 12·1        | 7          | 83,598           | 12,540         | 4,180          |
|                        | Vihiga      | Yes       | 50·3        | 6·6        | 13·1        | 4          | 22,004           | 3,301          | 1,452          |
| Nairobi                | Nairobi     |           | 89·1        | 20·7       | 23·2        | 51         | 197,079          | 29,562         | 40,795         |
| <b>KENYA</b>           |             | <b>57</b> | <b>61·8</b> | <b>8·7</b> | <b>14·0</b> | <b>340</b> | <b>1,879,796</b> | <b>281,969</b> | <b>162,828</b> |
| <i>Target Counties</i> |             | <b>33</b> | <b>52·9</b> | <b>4·9</b> | <b>9·3</b>  | <b>191</b> | <b>1,256,657</b> | <b>188,498</b> | <b>61,459</b>  |

CS = caesarean delivery procedure

TABLE S4· ESM-KETAMINE PROGRAM SCALE UP TARGETS

| <b>Year</b>                              | <b>1</b> | <b>2</b> | <b>3</b> | <b>4</b> | <b>5</b>   |
|------------------------------------------|----------|----------|----------|----------|------------|
| ESMK providers trained initially         | 72       | 144      | 144      | 144      | 69         |
| ESMK provider trained to offset turnover | 5        | 15       | 25       | 35       | 40         |
| Total ESMK providers in service          | 72       | 216      | 360      | 504      | <b>573</b> |
| Absolute number of QA/QC staff           | 1        | 2        | 2        | 3        | 4          |
| Facilities "on-line"                     | 24       | 72       | 120      | 168      | <b>191</b> |
| Coverage                                 | 13%      | 38%      | 63%      | 88%      | 100%       |

ESMK= Every Second Matters -Ketamine program, QA/QC = Quality Assurance/ Quality Control

TABLE S5· ESM-KETAMINE PROGRAM COST PROJECTION· BASE CASE, UNDISCOUNTED

| <b>Year</b>            | <b>1</b>         | <b>2</b>         | <b>3</b>         | <b>4</b>         | <b>5</b>         | <b>Total</b>       |
|------------------------|------------------|------------------|------------------|------------------|------------------|--------------------|
| Training (initial)     | \$61,200         | \$122,400        | \$122,400        | \$122,400        | \$58,650         | \$487,050          |
| Training (replacement) | \$4,250          | \$12,750         | \$21,250         | \$29,750         | \$34,000         | \$102,000          |
| QA/QC                  | \$16,400         | \$32,800         | \$32,800         | \$49,200         | \$65,600         | \$196,800          |
| Coordination           | \$48,000         | \$48,000         | \$48,000         | \$48,000         | \$48,000         | \$240,000          |
| Overhead               | \$19,478         | \$32,393         | \$33,668         | \$37,403         | \$30,938         | \$153,880          |
| <b>Total</b>           | <b>\$149,328</b> | <b>\$248,343</b> | <b>\$258,118</b> | <b>\$286,753</b> | <b>\$237,188</b> | <b>\$1,179,730</b> |

QA/QC = Quality Assurance/Quality Control

FIG S1. ANNUAL COST OF SCALING UP ESM-KETAMINE PROGRAM, BY ACTIVITY

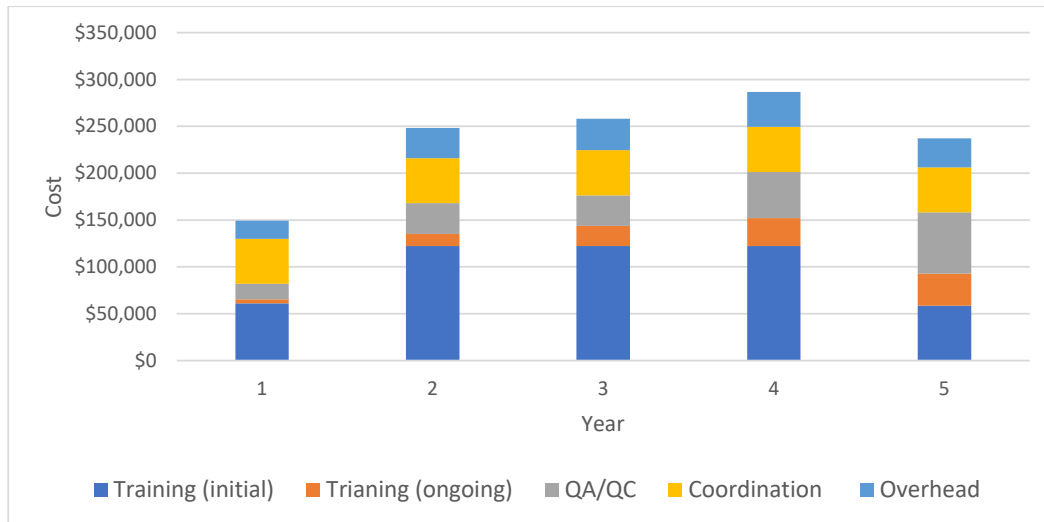

QA/QC = Quality Assurance/Quality Control



TABLE S6. EXPECTED HEALTH IMPACT OF EMERGENCY CAESAREAN DELIVERY, WEIGHTED AVERAGE LIVES SAVED ACROSS ALL INDICATIONS.

|          | <b>Lives Saved</b> | <b>Lives saved per Caesarean delivery</b> | <b>Number of procedures to save 1 life</b> |
|----------|--------------------|-------------------------------------------|--------------------------------------------|
| Maternal | 154                | 0·011                                     | 92                                         |
| Foetal   | 2,339              | 0·165                                     | 6·1                                        |
| Total    | 2,493              | 0·178                                     | 5·7                                        |

TABLE S7. FOETAL AND MATERNAL DEATHS IN 2017 ATTRIBUTABLE TO COMPLICATIONS THAT INDICATE EMERGENCY CAESAREAN DELIVERY UNDER A BASELINE SCENARIO AND AN “IMPROVED” SCENARIO IN WHICH THERE ARE NO BOTTLENECKS TO EMERGENCY CAESAREAN DELIVERY IN HOSPITAL FACILITIES.

| <b>Complication</b>        | <b>Foetal Deaths: Baseline</b> | <b>Foetal Deaths: Improved</b> | <b>Foetal Deaths Prevented</b> | <b>Percent of Foetal Deaths Prevented</b> |
|----------------------------|--------------------------------|--------------------------------|--------------------------------|-------------------------------------------|
| Foetal Abruption           | 5,093                          | 4982                           | 111                            | 5%                                        |
| Foetal Previa              | 508                            | 494                            | 14                             | 1%                                        |
| Foetal Ruptured Uterus     | 1,618                          | 1554                           | 64                             | 3%                                        |
| Foetal PE/E                | 6,077                          | 5712                           | 365                            | 16%                                       |
| SFD MB                     | 488                            | 461                            | 28                             | 1%                                        |
| SFD IUGR                   | 4,899                          | 4635                           | 264                            | 11%                                       |
| SFD Breech                 | 498                            | 470                            | 27                             | 1%                                        |
| SFD Cord                   | 1,996                          | 1889                           | 108                            | 5%                                        |
| SFD De Novo                | 5,891                          | 5575                           | 316                            | 14%                                       |
| Foetal OL                  | 7,195                          | 6665                           | 530                            | 23%                                       |
| NN Sepsis Term             | 6,490                          | 6395                           | 95                             | 4%                                        |
| Term BA                    | 12,318                         | 11900                          | 418                            | 18%                                       |
| <b>Total Foetal Deaths</b> | <b>53,071</b>                  | <b>50732</b>                   | <b>2,339</b>                   | <b>100%</b>                               |

  

| <b>Complication</b>          | <b>Maternal Deaths: Baseline</b> | <b>Maternal Deaths: Improved</b> | <b>Maternal Deaths Prevented</b> | <b>Percent of Maternal Deaths Prevented</b> |
|------------------------------|----------------------------------|----------------------------------|----------------------------------|---------------------------------------------|
| Maternal Sepsis              | 731                              | 717                              | 14                               | 9%                                          |
| Abruption                    | 348                              | 337                              | 12                               | 8%                                          |
| Previa                       | 104                              | 100                              | 4                                | 3%                                          |
| Ruptured Uterus              | 216                              | 205                              | 11                               | 7%                                          |
| Atonic Uterus                | 2,262                            | 2,254                            | 8                                | 5%                                          |
| PE/E                         | 931                              | 825                              | 106                              | 69%                                         |
| <b>Total Maternal Deaths</b> | <b>4,592</b>                     | <b>4,439</b>                     | <b>154</b>                       | <b>100%</b>                                 |

  

|                     |               |               |              |
|---------------------|---------------|---------------|--------------|
| <b>Total Deaths</b> | <b>57,663</b> | <b>55,171</b> | <b>2,493</b> |
|---------------------|---------------|---------------|--------------|
